# Supplementary material for: Symmetric dimethylarginine and creatinine concentrations in serum of healthy draft horses
Source: PubMed Central journal article supplement — J Vet Intern Med. 2021 Feb 5;35(2):1147–54. doi: 10.1111/jvim.16042 (PMC7995414; doi:10.1111/jvim.16042), 2021-02-05
Supplement: JVIM-35-1147-s001.pdf [file JVIM-35-1147-s001.pdf]

**Supplementary Table 1.** Mean recovery of symmetric dimethylarginine (SDMA) from duplicate immunoassay measurement of SDMA concentration in 3 equine serum samples spiked with an additional 10, 40, or 80  $\mu\text{g/dL}$  of SDMA.

| SDMA spike concentration         | spike recovery % | mean recovery % |
|----------------------------------|------------------|-----------------|
| low<br>(10 $\mu\text{g/dL}$ )    | 128%             | 113%            |
|                                  | 99%              |                 |
|                                  | 113%             |                 |
| medium<br>(40 $\mu\text{g/dL}$ ) | 106%             | 105%            |
|                                  | 106%             |                 |
|                                  | 105%             |                 |
| high<br>(80 $\mu\text{g/dL}$ )   | 114%             | 110%            |
|                                  | 105%             |                 |
|                                  | 109%             |                 |
