# Supplementary material for: Symmetric dimethylarginine and creatinine concentrations in serum of healthy draft horses
Source: PubMed Central journal article supplement — J Vet Intern Med. 2021 Feb 5;35(2):1147–54. doi: 10.1111/jvim.16042 (PMC7995414; doi:10.1111/jvim.16042), 2021-02-05
Supplement: JVIM-35-1147-s002.pdf [file JVIM-35-1147-s002.pdf]

**Supplementary Table 3.** Median and 95% confidence intervals for symmetric dimethylarginine (SDMA), measured by liquid chromatography-mass spectroscopy (LC-MS) and immunoassay, creatinine (Cr), and urea nitrogen (UN) concentrations in Percheron, Clydesdale, and Belgian horses.

| Breed      | SDMA ( $\mu\text{g/dL}$ )<br>LC-MS | SDMA ( $\mu\text{g/dL}$ )<br>immunoassay | Cr (mg/dL)    | UN (mg/dL)               |
|------------|------------------------------------|------------------------------------------|---------------|--------------------------|
| Percheron  | 9.0 (8.7,10.1) <sup>a</sup>        | 9.5 (8.0,10.0) <sup>a</sup>              | 1.3 (1.2,1.4) | 16 (15,17) <sup>ab</sup> |
| Clydesdale | 10.4 (9.7,11.9) <sup>b</sup>       | 10.8 (9.5,12.0) <sup>b</sup>             | 1.4 (1.3,1.5) | 15 (14,16) <sup>b</sup>  |
| Belgian    | 9.8 (9.4,10.6) <sup>ab</sup>       | 10.0 (9.5,10.5) <sup>bc</sup>            | 1.4 (1.3,1.5) | 17 (16,18) <sup>a</sup>  |
| P value    | .006                               | <.001                                    | .06           | .013                     |

<sup>a</sup> values with different superscripts within a column are different ( $P < .05$ )
