# Supplementary material for: Symmetric dimethylarginine and creatinine concentrations in serum of healthy draft horses
Source: PubMed Central journal article supplement — J Vet Intern Med. 2021 Feb 5;35(2):1147–54. doi: 10.1111/jvim.16042 (PMC7995414; doi:10.1111/jvim.16042), 2021-02-05
Supplement: JVIM-35-1147-s003.pdf [file JVIM-35-1147-s003.pdf]

**Supplementary Table 2.** Stability of symmetric dimethylarginine (SDMA), measured in duplicate by immunoassay, in 10 equine serum samples stored at -10, 4, or 25°C for 2 and 7 days.

| <b>-20°C</b>  |              |              |             |              |             |
|---------------|--------------|--------------|-------------|--------------|-------------|
| <b>Sample</b> | <b>Day 0</b> | <b>Day 2</b> | <b>Bias</b> | <b>Day 7</b> | <b>Bias</b> |
| #1            | 14.9         | 13.2         | -1.7        | 13.8         | -1.0        |
| #2            | 16.0         | 15.0         | -1.0        | 16.2         | 0.2         |
| #3            | 15.0         | 15.2         | 0.2         | 14.5         | -0.4        |
| #4            | 16.0         | 15.2         | -0.8        | 14.5         | -1.5        |
| #5            | 14.4         | 13.9         | -0.5        | 15.0         | 0.6         |
| #6            | 17.0         | 16.3         | -0.7        | 17.7         | 0.7         |
| #7            | 15.5         | 15.1         | -0.4        | 15.0         | -0.4        |
| #8            | 15.9         | 16.1         | 0.2         | 15.9         | 0.0         |
| #9            | 14.2         | 13.7         | -0.5        | 14.1         | -0.1        |
| #10           | 18.1         | 16.5         | -1.6        | 16.9         | -1.2        |
| <b>4°C</b>    |              |              |             |              |             |
| <b>Sample</b> | <b>Day 0</b> | <b>Day 2</b> | <b>Bias</b> | <b>Day 7</b> | <b>Bias</b> |
| #1            | 14.9         | 13.3         | -1.6        | 14.4         | -0.5        |
| #2            | 16.0         | 14.8         | -1.3        | 15.8         | -0.2        |
| #3            | 15.0         | 14.0         | -1.0        | 14.0         | -1.0        |
| #4            | 16.0         | 14.0         | -2.0        | 15.6         | -0.4        |
| #5            | 14.4         | 13.6         | -0.8        | 13.3         | -1.1        |
| #6            | 17.0         | 17.1         | 0.1         | 16.5         | -0.5        |
| #7            | 15.5         | 14.8         | -0.6        | 16.0         | 0.5         |
| #8            | 15.9         | 15.0         | -0.9        | 16.2         | 0.3         |
| #9            | 14.2         | 14.7         | 0.5         | 13.1         | -1.1        |
| #10           | 18.1         | 17.1         | -1.0        | 17.2         | -0.9        |
| <b>25°C</b>   |              |              |             |              |             |
| <b>Sample</b> | <b>Day 0</b> | <b>Day 2</b> | <b>Bias</b> | <b>Day 7</b> | <b>Bias</b> |
| #1            | 14.9         | 14.5         | -0.4        | 13.1         | -1.8        |
| #2            | 16.0         | 15.9         | -0.2        | 14.8         | -1.2        |
| #3            | 15.0         | 15.6         | 0.7         | 15.1         | 0.1         |
| #4            | 16.0         | 15.0         | -1.0        | 15.4         | -0.6        |
| #5            | 14.4         | 13.6         | -0.8        | 13.6         | -0.8        |
| #6            | 17.0         | 17.4         | 0.4         | 17.1         | 0.1         |
| #7            | 15.5         | 15.4         | -0.1        | 14.9         | -0.6        |
| #8            | 15.9         | 15.5         | -0.4        | 15.5         | -0.4        |
| #9            | 14.2         | 14.6         | 0.4         | 14.8         | 0.6         |
| #10           | 18.1         | 16.9         | -1.2        | 17.0         | -1.1        |
