# Supplementary figures and images for: Symmetric dimethylarginine and creatinine concentrations in serum of healthy draft horses
Source: PubMed Central journal article supplement — J Vet Intern Med. 2021 Feb 5;35(2):1147–54. doi: 10.1111/jvim.16042 (PMC7995414; doi:10.1111/jvim.16042), 2021-02-05

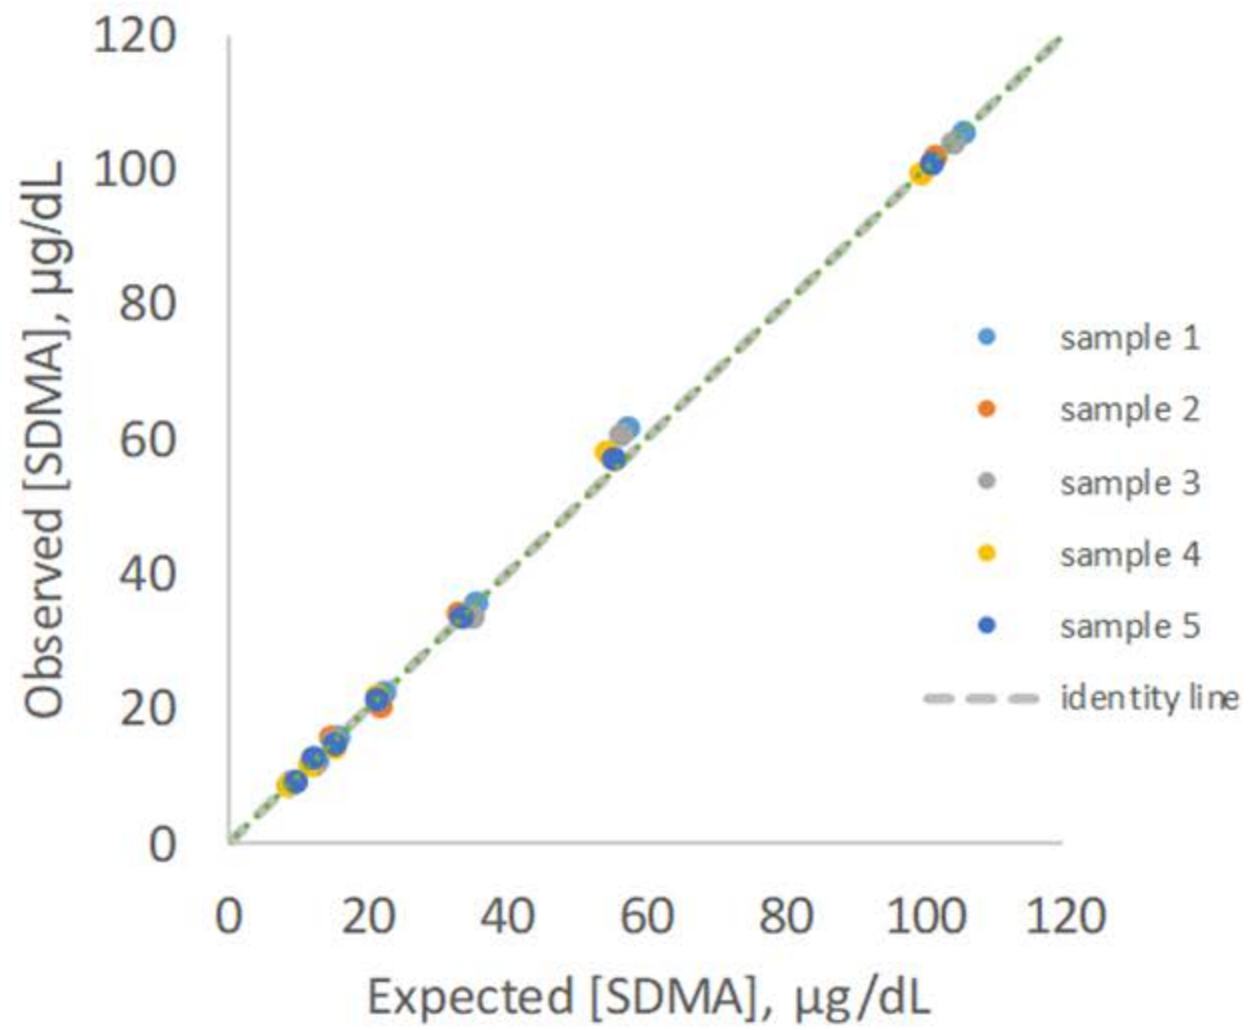

Supplement: JVIM-35-1147-s004.pdf [file JVIM-35-1147-s004.pdf]
